# Supplementary material
Source: publisher figshare collection journal article supplement (https://sage.figshare.com/ndownloader/files/38458028)
Supplement: Supplementary file 1 [file 38458028]

Interacting region in NEAT1	Genomic context	Ensembl ID of interacting gene	Gene name	Gene typelncRNAmiRNAncRNAothersprotein_codingpseudogenerRNAsnRNAtRNA	Interacting region	Genomic context	Species	Cell line.HEK293THelaHela(highRNase)Hela(lowRNase)Keratinocytes	Method/SourceLIGRseqNPInterv3.0PARISRAIDv2.0RAINv1.0RIAseqSPLASH	PMID
chr11:65437852-65437905	Exon	ENSG00000198786	MT-ND5	protein_coding	chrM:12501-12539	CDS	human	Hela(highRNase)	PARIS	27180905
chr11:65437479-65437545	Exon	ENSG00000198786	MT-ND5	protein_coding	chrM:12520-12546	CDS	human	Hela(highRNase)	PARIS	27180905
chr11:65430398-65430419	Exon	ENSG00000198886	MT-ND4	protein_coding	chrM:11739-11782	CDS	human	Hela(highRNase)	PARIS	27180905
chr11:65437479-65437559	Exon	ENSG00000198786	MT-ND5	protein_coding	chrM:12520-12546	CDS	human	Hela(highRNase)	PARIS	27180905
chr11:65426706-65426751	Exon	ENSG00000198786	MT-ND5	protein_coding	chrM:13152-13196	CDS	human	Hela(highRNase)	PARIS	27180905
chr11:65426833-65426891	Exon	ENSG00000198804	MT-CO1	protein_coding	chrM:6015-6038	CDS	human	Hela(highRNase)	PARIS	27180905
chr11:65437072-65437116	Exon	ENSG00000130827	PLXNA3	protein_coding	chrX:154475935-154475968	3UTR	human	Hela(highRNase)	PARIS	27180905
chr11:65435710-65435733	Exon	ENSG00000188994	ZNF292	protein_coding	chr6:87259656-87259676	CDS	human	Hela(highRNase)	PARIS	27180905
chr11:65437072-65437093	Exon	ENSG00000130827	PLXNA3	protein_coding	chrX:154475935-154475968	3UTR	human	Hela(highRNase)	PARIS	27180905
chr11:65434341-65434363	Exon	ENSG00000135842	FAM129A	protein_coding	chr1:184791859-184791905	3UTR	human	Hela(highRNase)	PARIS	27180905
chr11:65434341-65434368	Exon	ENSG00000135842	FAM129A	protein_coding	chr1:184791859-184791905	3UTR	human	Hela(highRNase)	PARIS	27180905
chr11:65434341-65434403	Exon	ENSG00000135842	FAM129A	protein_coding	chr1:184791859-184791905	3UTR	human	Hela(highRNase)	PARIS	27180905
chr11:65438581-65438605	Exon	ENSG00000117523	PRRC2C	protein_coding	chr1:171541072-171541121	CDS	human	Hela(highRNase)	PARIS	27180905
chr11:65432420-65432449	Exon	ENSG00000198886	MT-ND4	protein_coding	chrM:11255-11280	CDS	human	Hela(highRNase)	PARIS	27180905
chr11:65427147-65427194	Exon	ENSG00000210082	MT-RNR2	rRNA	chrM:2323-2380	Exon	human	Hela(highRNase)	PARIS	27180905
chr11:65430612-65430642	Exon	ENSG00000210082	MT-RNR2	rRNA	chrM:3110-3156	Exon	human	Hela(highRNase)	PARIS	27180905
chr11:65428266-65428300	Exon	ENSG00000206585	RNVU1-7	snRNA	chr1:148038812-148038886	Exon	human	Hela(highRNase)	PARIS	27180905
chr11:65431045-65431066	Exon	ENSG00000220069	RPL7P27	pseudogene	chr6:86086736-86086763	Exon	human	Hela(highRNase)	PARIS	27180905
chr11:65431045-65431071	Exon	ENSG00000220069	RPL7P27	pseudogene	chr6:86086736-86086763	Exon	human	Hela(highRNase)	PARIS	27180905
chr11:65434686-65434717	Exon	ENSG00000106460	TMEM106B	protein_coding	chr7:12241823-12241864	3UTR	human	Hela(highRNase)	PARIS	27180905
chr11:65434738-65434761	Exon	ENSG00000182667	NTM	protein_coding	chr11:132336469-132336487	3UTR	human	Hela(highRNase)	PARIS	27180905
chr11:65423925-65423972	Exon	ENSG00000116786	PLEKHM2	protein_coding	chr1:15719817-15719837	CDS	human	Hela(highRNase)	PARIS	27180905
chr11:65435723-65435781	Exon	ENSG00000175893	ZDHHC21	protein_coding	chr9:14672907-14672926	CDS	human	Hela(highRNase)	PARIS	27180905
chr11:65431029-65431076	Exon	ENSG00000169895	SYAP1	protein_coding	chrX:16754944-16754976	CDS	human	Hela(highRNase)	PARIS	27180905
chr11:65436490-65436511	Exon	ENSG00000008952	SEC62	protein_coding	chr3:169995931-169995949	3UTR	human	Hela(highRNase)	PARIS	27180905
chr11:65444767-65444799	Exon	ENSG00000118971	CCND2	protein_coding	chr12:4300810-4300841	3UTR	human	Hela(highRNase)	PARIS	27180905
chr11:65444767-65444844	Exon	ENSG00000118971	CCND2	protein_coding	chr12:4300810-4300841	3UTR	human	Hela(highRNase)	PARIS	27180905
chr11:65426555-65426577	Exon	ENSG00000137804	NUSAP1	protein_coding	chr15:41380974-41381007	3UTR	human	Hela(highRNase)	PARIS	27180905
chr11:65427706-65427730	Exon	ENSG00000228592	D21S2088E	lncRNA	chr21:23361248-23361273	Exon	human	Hela(highRNase)	PARIS	27180905
chr11:65433904-65433960	Exon	ENSG00000105793	GTPBP10	protein_coding	chr7:90389813-90389854	3UTR	human	Hela(highRNase)	PARIS	27180905
chr11:65423412-65423449	Exon	ENSG00000107290	SETX	protein_coding	chr9:132327903-132327921	CDS	human	Hela(highRNase)	PARIS	27180905
chr11:65441398-65441460	Exon	ENSG00000164318	EGFLAM	protein_coding	chr5:38418160-38418178	CDS	human	Hela(highRNase)	PARIS	27180905
chr11:65433038-65433072	Exon	ENSG00000124486	USP9X	protein_coding	chrX:41233375-41233393	3UTR	human	Hela(highRNase)	PARIS	27180905
chr11:65427356-65427402	Exon	ENSG00000136449	MYCBPAP	protein_coding	chr17:50528218-50528236	CDS	human	Hela(highRNase)	PARIS	27180905
chr11:65427356-65427417	Exon	ENSG00000136449	MYCBPAP	protein_coding	chr17:50528218-50528236	CDS	human	Hela(highRNase)	PARIS	27180905
chr11:65426609-65426630	Exon	ENSG00000119231	SENP5	protein_coding	chr3:196933194-196933247	3UTR	human	Hela(highRNase)	PARIS	27180905
chr11:65437172-65437210	Exon	ENSG00000150637	CD226	protein_coding	chr18:69861539-69861573	3UTR	human	Hela(highRNase)	PARIS	27180905
chr11:65434423-65434450	Exon	ENSG00000261635	RP11-618N24	pseudogene	chr15:36613571-36613607	Exon	human	Hela(highRNase)	PARIS	27180905
chr11:65433830-65433867	Exon	ENSG00000260928	SPCS2P1	pseudogene	chr15:43131049-43131068	Exon	human	Hela(highRNase)	PARIS	27180905
chr11:65433710-65433730	Exon	ENSG00000261020	RP11-744K17	lncRNA	chr17:22421231-22421250	Exon	human	Hela(highRNase)	PARIS	27180905
chr11:65436906-65436934	Exon	ENSG00000205659	LIN52	protein_coding	chr14:74200717-74200741	3UTR	human	Hela(highRNase)	PARIS	27180905
chr11:65427536-65427567	Exon	ENSG00000185567	AHNAK2	protein_coding	chr14:104956606-104956627	CDS	human	Hela(highRNase)	PARIS	27180905
chr11:65425688-65425741	Exon	ENSG00000060237	WNK1	protein_coding	chr12:878239-878273	CDS	human	Hela(highRNase)	PARIS	27180905
chr11:65425688-65425749	Exon	ENSG00000060237	WNK1	protein_coding	chr12:878239-878273	CDS	human	Hela(highRNase)	PARIS	27180905
chr11:65432158-65432197	Exon	ENSG00000172059	KLF11	protein_coding	chr2:10053064-10053082	3UTR	human	Hela(highRNase)	PARIS	27180905
chr11:65424189-65424256	Exon	ENSG00000251562	MALAT1	lncRNA	chr11:65499354-65499384	Exon	human	Hela(highRNase)	PARIS	27180905
chr11:65440792-65440829	Exon	ENSG00000198270	TMEM116	protein_coding	chr12:111935160-111935210	CDS	human	Hela(highRNase)	PARIS	27180905
chr11:65436691-65436710	Exon	ENSG00000256473	RP11-437F6	ncRNA	chr12:23638318-23638338	Exon	human	Hela(highRNase)	PARIS	27180905
chr11:65424832-65424887	Exon	ENSG00000276293	PIP4K2B	protein_coding	chr17:38766131-38766184	3UTR	human	Hela(highRNase)	PARIS	27180905
chr11:65437818-65437854	Exon	ENSG00000167615	LENG8	protein_coding	chr19:54459679-54459720	3UTR	human	Hela(highRNase)	PARIS	27180905
chr11:65444887-65444905	Exon	ENSG00000275647	RP11-209D20	pseudogene	chr4:128944720-128944739	Exon	human	Hela(highRNase)	PARIS	27180905
chr11:65437215-65437250	Exon	ENSG00000105697	HAMP	protein_coding	chr19:35284854-35284873	CDS	human	Hela(highRNase)	PARIS	27180905
chr11:65430959-65430980	Exon	ENSG00000134830	C5AR2	protein_coding	chr19:47342692-47342711	3UTR	human	Hela(highRNase)	PARIS	27180905
chr11:65430959-65430999	Exon	ENSG00000134830	C5AR2	protein_coding	chr19:47342692-47342711	3UTR	human	Hela(highRNase)	PARIS	27180905
chr11:65432313-65432332	Exon	ENSG00000188825	LINC00910	lncRNA	chr17:43387342-43387390	Exon	human	Hela(highRNase)	PARIS	27180905
chr11:65427806-65427830	Exon	ENSG00000166347	CYB5A	protein_coding	chr18:74259880-74259899	CDS	human	Hela(highRNase)	PARIS	27180905
chr11:65434685-65434734	Exon	ENSG00000266340	RP11-848P1	ncRNA	chr17:30978733-30978785	Exon	human	Hela(highRNase)	PARIS	27180905
chr11:65434685-65434719	Exon	ENSG00000266340	RP11-848P1	ncRNA	chr17:30978733-30978785	Exon	human	Hela(highRNase)	PARIS	27180905
chr11:65434685-65434740	Exon	ENSG00000266340	RP11-848P1	ncRNA	chr17:30978733-30978785	Exon	human	Hela(highRNase)	PARIS	27180905
chr11:65441893-65441919	Exon	ENSG00000142676	RPL11	protein_coding	chr1:23695124-23695176	3UTR	human	Hela(highRNase)	PARIS	27180905
chr11:65428270-65428332	Exon	ENSG00000196917	HCAR1	protein_coding	chr12:122726866-122726912	3UTR	human	Hela(highRNase)	PARIS	27180905
chr11:65432552-65432593	Exon	ENSG00000146414	SHPRH	protein_coding	chr6:145909301-145909327	3UTR	human	Hela(highRNase)	PARIS	27180905
chr11:65435185-65435207	Exon	ENSG00000151247	EIF4E	protein_coding	chr4:98872883-98872918	3UTR	human	Hela(highRNase)	PARIS	27180905
chr11:65425305-65425324	Exon	ENSG00000126464	PRR12	protein_coding	chr19:49626282-49626307	3UTR	human	Hela(highRNase)	PARIS	27180905
chr11:65436511-65436533	Exon	ENSG00000224597	SVIL-AS1	ncRNA	chr10:29421616-29421678	Exon	human	Hela(highRNase)	PARIS	27180905
chr11:65443653-65443682	Exon	ENSG00000174151	CYB561D1	protein_coding	chr1:109496636-109496662	3UTR	human	Hela(highRNase)	PARIS	27180905
chr11:65434064-65434105	Exon	ENSG00000177565	TBL1XR1	protein_coding	chr3:177025119-177025142	3UTR	human	Hela(highRNase)	PARIS	27180905
chr11:65438895-65438913	Exon	ENSG00000250938	RP11-679C8	ncRNA	chr4:120083363-120083386	Exon	human	Hela(highRNase)	PARIS	27180905
chr11:65425356-65425427	Exon	ENSG00000115183	TANC1	protein_coding	chr2:159226858-159226888	CDS	human	Hela(highRNase)	PARIS	27180905
chr11:65444680-65444715	Exon	ENSG00000254003	CTB-167B5	ncRNA	chr7:88216712-88216730	Exon	human	Hela(highRNase)	PARIS	27180905
chr11:65425117-65425153	Exon	ENSG00000145113	MUC4	protein_coding	chr3:195784981-195785047	CDS	human	Hela(highRNase)	PARIS	27180905
chr11:65440738-65440780	Exon	ENSG00000205085	FAM71F2	protein_coding	chr7:128686179-128686218	3UTR	human	Hela(highRNase)	PARIS	27180905
chr11:65432972-65433006	Exon	ENSG00000243197	TUSC7	ncRNA	chr3:116709889-116709915	Exon	human	Hela(highRNase)	PARIS	27180905
chr11:65442215-65442243	Exon	ENSG00000201428	RN7SKP71	ncRNA	chr12:112267164-112267201	Exon	human	HEK293T	PARIS	27180905
chr11:65443868-65443891	Exon	ENSG00000197969	VPS13A	protein_coding	chr9:77177619-77177653	5UTR	human	HEK293T	PARIS	27180905
chr11:65436516-65436546	Exon	ENSG00000075651	PLD1	protein_coding	chr3:171738018-171738039	CDS	human	HEK293T	PARIS	27180905
chr11:65430142-65430172	Exon	ENSG00000200091	RN7SKP163	ncRNA	chr6:75655248-75655279	Exon	human	HEK293T	PARIS	27180905
chr11:65424927-65424950	Exon	ENSG00000198899	MT-ATP6	protein_coding	chrM:8930-8950	CDS	human	HEK293T	PARIS	27180905
chr11:65442323-65442343	Exon	ENSG00000199497	RNU1-94P	snRNA	chr20:31901254-31901272	Exon	human	HEK293T	PARIS	27180905
chr11:65444232-65444257	Exon	ENSG00000207110	RNU1-106P	snRNA	chr8:127999130-127999161	Exon	human	HEK293T	PARIS	27180905
chr11:65426420-65426443	Exon	ENSG00000207110	RNU1-106P	snRNA	chr8:127999130-127999160	Exon	human	HEK293T	PARIS	27180905
chr11:65444042-65444067	Exon	ENSG00000207110	RNU1-106P	snRNA	chr8:127999130-127999157	Exon	human	HEK293T	PARIS	27180905
chr11:65444140-65444175	Exon	ENSG00000211459	MT-RNR1	rRNA	chrM:1221-1250	Exon	human	HEK293T	PARIS	27180905
chr11:65435279-65435306	Exon	ENSG00000204469	PRRC2A	protein_coding	chr6:31632724-31632745	CDS	human	HEK293T	PARIS	27180905
chr11:65431654-65431676	Exon	ENSG00000136750	GAD2	protein_coding	chr10:26303980-26304002	3UTR	human	HEK293T	PARIS	27180905
chr11:65434531-65434552	Exon	ENSG00000206585	RNVU1-7	snRNA	chr1:148038881-148038916	Exon	human	HEK293T	PARIS	27180905
chr11:65433882-65433911	Exon	ENSG00000206820	RNU1-138P	snRNA	chr4:113420322-113420351	Exon	human	HEK293T	PARIS	27180905
chr11:65428429-65428450	Exon	ENSG00000198743	SLC5A3	protein_coding	chr21:34101999-34102018	3UTR	human	HEK293T	PARIS	27180905
chr11:65439995-65440018	Exon	ENSG00000113583	C5orf15	protein_coding	chr5:133968455-133968472	CDS	human	HEK293T	PARIS	27180905
chr11:65423501-65423521	Exon	ENSG00000106789	CORO2A	protein_coding	chr9:98128169-98128197	CDS	human	HEK293T	PARIS	27180905
chr11:65423501-65423521	Exon	ENSG00000106789	CORO2A	protein_coding	chr9:98128169-98128191	CDS	human	HEK293T	PARIS	27180905
chr11:65433890-65433911	Exon	ENSG00000194297	RNU1-75P	snRNA	chr1:119331491-119331516	Exon	human	HEK293T	PARIS	27180905
chr11:65423501-65423520	Exon	ENSG00000170381	SEMA3E	protein_coding	chr7:83408392-83408412	CDS	human	HEK293T	PARIS	27180905
chr11:65425685-65425709	Exon	ENSG00000167548	KMT2D	protein_coding	chr12:49037489-49037507	CDS	human	HEK293T	PARIS	27180905
chr11:65443125-65443145	Exon	ENSG00000125945	ZNF436	protein_coding	chr1:23362930-23362968	CDS	human	HEK293T	PARIS	27180905
chr11:65428015-65428037	Exon	ENSG00000261441	RP11-217B1	ncRNA	chr15:89335109-89335128	Exon	human	HEK293T	PARIS	27180905
chr11:65428418-65428452	Exon	ENSG00000180287	PLD5	protein_coding	chr1:242084522-242084541	3UTR	human	HEK293T	PARIS	27180905
chr11:65438613-65438644	Exon	ENSG00000275215	RNA5-8S5	rRNA	chr21:8395630-8395660	Exon	human	HEK293T	PARIS	27180905
chr11:65426093-65426120	Exon	ENSG00000275215	RNA5-8S5	rRNA	chr21:8395622-8395654	Exon	human	HEK293T	PARIS	27180905
chr11:65445433-65445454	Exon	ENSG00000275215	RNA5-8S5	rRNA	chr21:8395704-8395724	Exon	human	HEK293T	PARIS	27180905
chr11:65428405-65428433	Exon	ENSG00000167220	HDHD2	protein_coding	chr18:47109171-47109190	CDS	human	HEK293T	PARIS	27180905
chr11:65437732-65437763	Exon	ENSG00000122378	FAM213A	protein_coding	chr10:80435720-80435753	3UTR	human	HEK293T	PARIS	27180905
chr11:65430164-65430209	Exon	ENSG00000186094	AGBL4	protein_coding	chr1:48584174-48584192	3UTR	human	HEK293T	PARIS	27180905
chr11:65430134-65430152	Exon	ENSG00000189157	FAM47E	protein_coding	chr4:76278620-76278640	CDS	human	HEK293T	PARIS	27180905
chr11:65434282-65434310	Exon	ENSG00000223501	VPS52	protein_coding	chr6:33271511-33271529	CDS	human	HEK293T	PARIS	27180905
chr11:65423793-65423825	Exon	ENSG00000182383	RPL27AP5	pseudogene	chr5:74990405-74990438	Exon	human	HEK293T	PARIS	27180905
chr11:65431488-65431512	Exon	ENSG00000148688	RPP30	protein_coding	chr10:90885859-90885877	CDS	human	Hela(lowRNase)	PARIS	27180905
chr11:65426941-65426987	Exon	ENSG00000099194	SCD	protein_coding	chr10:100362779-100362808	3UTR	human	Hela(lowRNase)	PARIS	27180905
chr11:65436949-65436989	Exon	ENSG00000129422	MTUS1	protein_coding	chr8:17644326-17644366	3UTR	human	Hela(lowRNase)	PARIS	27180905
chr11:65429665-65429720	Exon	ENSG00000139514	SLC7A1	protein_coding	chr13:29512484-29512506	3UTR	human	Hela(lowRNase)	PARIS	27180905
chr11:65423925-65423972	Exon	ENSG00000116786	PLEKHM2	protein_coding	chr1:15719817-15719837	CDS	human	Hela(lowRNase)	PARIS	27180905
chr11:65433831-65433876	Exon	ENSG00000102554	KLF5	protein_coding	chr13:73076162-73076194	3UTR	human	Hela(lowRNase)	PARIS	27180905
chr11:65432420-65432448	Exon	ENSG00000198886	MT-ND4	protein_coding	chrM:11255-11280	CDS	human	Hela(lowRNase)	PARIS	27180905
chr11:65435179-65435202	Exon	ENSG00000198886	MT-ND4	protein_coding	chrM:11085-11114	CDS	human	Hela(lowRNase)	PARIS	27180905
chr11:65429680-65429717	Exon	ENSG00000198886	MT-ND4	protein_coding	chrM:11137-11207	CDS	human	Hela(lowRNase)	PARIS	27180905
chr11:65425114-65425154	Exon	ENSG00000198886	MT-ND4	protein_coding	chrM:11319-11359	CDS	human	Hela(lowRNase)	PARIS	27180905
chr11:65436148-65436188	Exon	ENSG00000198886	MT-ND4	protein_coding	chrM:10907-10928	CDS	human	Hela(lowRNase)	PARIS	27180905
chr11:65425956-65425996	Exon	ENSG00000198763	MT-ND2	protein_coding	chrM:5157-5196	CDS	human	Hela(lowRNase)	PARIS	27180905
chr11:65437852-65437905	Exon	ENSG00000198786	MT-ND5	protein_coding	chrM:12501-12539	CDS	human	Hela(lowRNase)	PARIS	27180905
chr11:65426706-65426751	Exon	ENSG00000198786	MT-ND5	protein_coding	chrM:13152-13196	CDS	human	Hela(lowRNase)	PARIS	27180905
chr11:65434341-65434403	Exon	ENSG00000135842	FAM129A	protein_coding	chr1:184791859-184791905	3UTR	human	Hela(lowRNase)	PARIS	27180905
chr11:65436869-65436930	Exon	ENSG00000198804	MT-CO1	protein_coding	chrM:6902-6942	CDS	human	Hela(lowRNase)	PARIS	27180905
chr11:65426864-65426889	Exon	ENSG00000198786	MT-ND5	protein_coding	chrM:13980-14005	CDS	human	Hela(lowRNase)	PARIS	27180905
chr11:65432973-65432996	Exon	ENSG00000115896	PLCL1	protein_coding	chr2:198147216-198147237	3UTR	human	Hela(lowRNase)	PARIS	27180905
chr11:65432977-65433000	Exon	ENSG00000143970	ASXL2	protein_coding	chr2:25742752-25742807	CDS	human	Hela(lowRNase)	PARIS	27180905
chr11:65432552-65432592	Exon	ENSG00000146414	SHPRH	protein_coding	chr6:145909301-145909327	3UTR	human	Hela(lowRNase)	PARIS	27180905
chr11:65424189-65424212	Exon	ENSG00000229807	XIST	lncRNA	chrX:73844102-73844173	Exon	human	Hela(lowRNase)	PARIS	27180905
chr11:65443653-65443682	Exon	ENSG00000174151	CYB561D1	protein_coding	chr1:109496636-109496662	3UTR	human	Hela(lowRNase)	PARIS	27180905
chr11:65434064-65434105	Exon	ENSG00000177565	TBL1XR1	protein_coding	chr3:177025119-177025142	3UTR	human	Hela(lowRNase)	PARIS	27180905
chr11:65432216-65432256	Exon	ENSG00000206585	RNVU1-7	snRNA	chr1:148038850-148038916	Exon	human	Hela(lowRNase)	PARIS	27180905
chr11:65432700-65432727	Exon	ENSG00000211459	MT-RNR1	rRNA	chrM:1403-1477	Exon	human	Hela(lowRNase)	PARIS	27180905
chr11:65431408-65431436	Exon	ENSG00000211459	MT-RNR1	rRNA	chrM:1221-1266	Exon	human	Hela(lowRNase)	PARIS	27180905
chr11:65428282-65428312	Exon	ENSG00000210082	MT-RNR2	rRNA	chrM:2642-2710	Exon	human	Hela(lowRNase)	PARIS	27180905
chr11:65430612-65430642	Exon	ENSG00000210082	MT-RNR2	rRNA	chrM:3110-3156	Exon	human	Hela(lowRNase)	PARIS	27180905
chr11:65429991-65430022	Exon	ENSG00000131504	DIAPH1	protein_coding	chr5:141515800-141515818	3UTR	human	Hela(lowRNase)	PARIS	27180905
chr11:65437745-65437779	Exon	ENSG00000210107	MT-TQ	tRNA	chrM:4371-4393	Exon	human	Hela(lowRNase)	PARIS	27180905
chr11:65426555-65426599	Exon	ENSG00000137804	NUSAP1	protein_coding	chr15:41380974-41381007	3UTR	human	Hela(lowRNase)	PARIS	27180905
chr11:65435279-65435315	Exon	ENSG00000104093	DMXL2	protein_coding	chr15:51474475-51474498	CDS	human	Hela(lowRNase)	PARIS	27180905
chr11:65424211-65424255	Exon	ENSG00000134057	CCNB1	protein_coding	chr5:69177718-69177740	3UTR	human	Hela(lowRNase)	PARIS	27180905
chr11:65437176-65437211	Exon	ENSG00000139800	ZIC5	protein_coding	chr13:99965006-99965042	3UTR	human	Hela(lowRNase)	PARIS	27180905
chr11:65427936-65427961	Exon	ENSG00000148734	NPFFR1	protein_coding	chr10:70250580-70250598	3UTR	human	Hela(lowRNase)	PARIS	27180905
chr11:65433711-65433745	Exon	ENSG00000145029	NICN1	protein_coding	chr3:49423130-49423151	3UTR	human	Hela(lowRNase)	PARIS	27180905
chr11:65432768-65432818	Exon	ENSG00000109171	SLAIN2	protein_coding	chr4:48379740-48379798	CDS	human	Hela(lowRNase)	PARIS	27180905
chr11:65429943-65429987	Exon	ENSG00000106682	EIF4H	protein_coding	chr7:74196449-74196470	3UTR	human	Hela(lowRNase)	PARIS	27180905
chr11:65439307-65439329	Exon	ENSG00000270111	RP11-271F18	lncRNA	chr10:10418842-10418867	Exon	human	Hela(highRNase)	PARIS	27180905
chr11:65426469-65426504	Exon	ENSG00000119862	LGALSL	protein_coding	chr2:64459042-64459063	3UTR	human	Hela(lowRNase)	PARIS	27180905
chr11:65433657-65433679	Exon	ENSG00000105939	ZC3HAV1	protein_coding	chr7:139044537-139044564	3UTR	human	Hela(lowRNase)	PARIS	27180905
chr11:65437499-65437552	Exon	ENSG00000186432	KPNA4	protein_coding	chr3:160500391-160500436	3UTR	human	Hela(lowRNase)	PARIS	27180905
chr11:65444306-65444329	Exon	ENSG00000179674	ARL14	protein_coding	chr3:160677752-160677773	CDS	human	Hela(lowRNase)	PARIS	27180905
chr11:65437585-65437618	Exon	ENSG00000170275	CRTAP	protein_coding	chr3:33132559-33132586	CDS	human	Hela(lowRNase)	PARIS	27180905
chr11:65436139-65436170	Exon	ENSG00000155096	AZIN1	protein_coding	chr8:102827270-102827294	3UTR	human	Hela(lowRNase)	PARIS	27180905
chr11:65436567-65436588	Exon	ENSG00000280202	RP5-1180D12	protein_coding	chr12:3610546-3610567	Exon	human	Hela(lowRNase)	PARIS	27180905
chr11:65434724-65434775	Exon	ENSG00000145012	LPP	protein_coding	chr3:188887517-188887549	3UTR	human	Hela(lowRNase)	PARIS	27180905
chr11:65424832-65424887	Exon	ENSG00000276293	PIP4K2B	protein_coding	chr17:38766131-38766184	3UTR	human	Hela(lowRNase)	PARIS	27180905
chr11:65425356-65425427	Exon	ENSG00000115183	TANC1	protein_coding	chr2:159226858-159226888	CDS	human	Hela(lowRNase)	PARIS	27180905
chr11:65425419-65425481	Exon	ENSG00000183309	ZNF623	protein_coding	chr8:143652757-143652781	3UTR	human	Hela(lowRNase)	PARIS	27180905
chr11:65438152-65438206	Exon	ENSG00000249896	RP11-586D19	lncRNA	chr4:6233421-6233440	Exon	human	Hela(lowRNase)	PARIS	27180905
chr11:65436111-65436140	Exon	ENSG00000225630	MTND2P28	pseudogene	chr1:629956-630025	Exon	human	Hela(lowRNase)	PARIS	27180905
chr11:65442422-65442460	Exon	ENSG00000211456	SACM1L	protein_coding	chr3:45744393-45744453	3UTR	human	Hela(lowRNase)	PARIS	27180905
chr11:65431929-65431962	Exon	ENSG00000114354	TFG	protein_coding	chr3:100743288-100743305	CDS	human	Hela(lowRNase)	PARIS	27180905
chr11:65438967-65438986	Exon	ENSG00000136261	BZW2	protein_coding	chr7:16686006-16686028	CDS	human	Hela(lowRNase)	PARIS	27180905
chr11:65425117-65425153	Exon	ENSG00000145113	MUC4	protein_coding	chr3:195784981-195785047	CDS	human	Hela(lowRNase)	PARIS	27180905
chr11:65430436-65430468	Exon	ENSG00000262833	RP11-28G8	ncRNA	chr17:80805540-80805564	Exon	human	Hela(lowRNase)	PARIS	27180905
chr11:65434423-65434450	Exon	ENSG00000261635	RP11-618N24	pseudogene	chr15:36613571-36613607	Exon	human	Hela(lowRNase)	PARIS	27180905
chr11:65437215-65437249	Exon	ENSG00000105697	HAMP	protein_coding	chr19:35284854-35284873	CDS	human	Hela(lowRNase)	PARIS	27180905
chr11:65427806-65427830	Exon	ENSG00000166347	CYB5A	protein_coding	chr18:74259880-74259899	CDS	human	Hela(lowRNase)	PARIS	27180905
chr11:65434685-65434740	Exon	ENSG00000266340	RP11-848P1	ncRNA	chr17:30978733-30978785	Exon	human	Hela(lowRNase)	PARIS	27180905
chr11:65432313-65432332	Exon	ENSG00000188825	LINC00910	lncRNA	chr17:43387342-43387390	Exon	human	Hela(lowRNase)	PARIS	27180905
chr11:65436484-65436507	Exon	ENSG00000153815	CMIP	protein_coding	chr16:81710931-81710956	3UTR	human	Hela(lowRNase)	PARIS	27180905
chr11:65437583-65437622	Exon	ENSG00000158636	C11orf30	protein_coding	chr11:76458297-76458316	CDS	human	Hela(lowRNase)	PARIS	27180905
chr11:65436906-65436934	Exon	ENSG00000205659	LIN52	protein_coding	chr14:74200717-74200741	3UTR	human	Hela(lowRNase)	PARIS	27180905
chr11:65424518-65424540	Exon	ENSG00000255717	SNHG1	ncRNA	chr11:62852204-62852229	Exon	human	Hela(lowRNase)	PARIS	27180905
chr11:65428066-65428103	Exon	ENSG00000255717	SNHG1	ncRNA	chr11:62852150-62852175	Exon	human	Hela(lowRNase)	PARIS	27180905
chr11:65424435-65424476	Exon	ENSG00000113658	SMAD5	protein_coding	chr5:136174413-136174478	CDS	human	Hela(lowRNase)	PARIS	27180905
chr11:65422996-65423097	Exon	ENSG00000223573	TINCR	lncRNA	.	.	human	Keratinocytes	RIAseq	25259926
chr11:65445318-65445344	Exon	ENSG00000257923	CUX1	protein_coding	chr7:102249847-102249867	3UTR	human	Hela(highRNase)	PARIS	27180905
chr11:65444813-65444859	Exon	ENSG00000109854	HTATIP2	protein_coding	chr11:20364171-20364189	5UTR	human	Hela(highRNase)	PARIS	27180905
chr11:65440161-65440180	Exon	ENSG00000266627	RN7SL202P	ncRNA	chr19:3920399-3920446	Exon	human	Hela(highRNase)	PARIS	27180905
chr11:65440415-65440471	Exon	ENSG00000280058	RP1-131F15	protein_coding	chr6:131910772-131910824	Exon	human	Hela(highRNase)	PARIS	27180905
chr11:65440750-65440789	Exon	ENSG00000130741	EIF2S3	protein_coding	chrX:24077122-24077166	3UTR	human	Hela(highRNase)	PARIS	27180905
chr11:65440930-65440956	Exon	ENSG00000066427	ATXN3	protein_coding	chr14:92054374-92054413	3UTR	human	Hela(highRNase)	PARIS	27180905
chr11:65441176-65441201	Exon	ENSG00000210082	MT-RNR2	rRNA	chrM:2997-3026	Exon	human	Hela(highRNase)	PARIS	27180905
chr11:65441958-65441996	Exon	ENSG00000083857	FAT1	protein_coding	chr4:186597135-186597158	CDS	human	Hela(highRNase)	PARIS	27180905
chr11:65441958-65441996	Exon	ENSG00000083857	FAT1	protein_coding	chr4:186597124-186597158	CDS	human	Hela(highRNase)	PARIS	27180905
chr11:65441958-65441996	Exon	ENSG00000083857	FAT1	protein_coding	chr4:186597114-186597158	CDS	human	Hela(highRNase)	PARIS	27180905
chr11:65442281-65442321	Exon	ENSG00000163884	KLF15	protein_coding	chr3:126343151-126343180	3UTR	human	Hela(highRNase)	PARIS	27180905
chr11:65442296-65442320	Exon	ENSG00000163884	KLF15	protein_coding	chr3:126343151-126343186	3UTR	human	Hela(highRNase)	PARIS	27180905
chr11:65442296-65442321	Exon	ENSG00000163884	KLF15	protein_coding	chr3:126343151-126343179	3UTR	human	Hela(highRNase)	PARIS	27180905
chr11:65442539-65442575	Exon	ENSG00000139173	TMEM117	protein_coding	chr12:44389587-44389614	3UTR	human	Hela(highRNase)	PARIS	27180905
chr11:65442586-65442618	Exon	ENSG00000230709	AC104024	lncRNA	chr17:16980452-16980497	Exon	human	Hela(highRNase)	PARIS	27180905
chr11:65442908-65442935	Exon	ENSG00000197535	MYO5A	protein_coding	chr15:52312287-52312331	3UTR	human	Hela(highRNase)	PARIS	27180905
chr11:65443447-65443472	Exon	ENSG00000138674	SEC31A	protein_coding	chr4:82856995-82857036	CDS	human	Hela(highRNase)	PARIS	27180905
chr11:65443447-65443472	Exon	ENSG00000138674	SEC31A	protein_coding	chr4:82856985-82857036	CDS	human	Hela(highRNase)	PARIS	27180905
chr11:65443594-65443612	Exon	ENSG00000116221	MRPL37	protein_coding	chr1:54216262-54216281	CDS	human	Hela(highRNase)	PARIS	27180905
chr11:65443861-65443910	Exon	ENSG00000135378	PRRG4	protein_coding	chr11:32855335-32855357	3UTR	human	Hela(highRNase)	PARIS	27180905
chr11:65444157-65444175	Exon	ENSG00000125484	GTF3C4	protein_coding	chr9:132690034-132690058	3UTR	human	Hela(highRNase)	PARIS	27180905
chr11:65444157-65444175	Exon	ENSG00000127527	EPS15L1	protein_coding	chr19:16435199-16435251	5UTR	human	Hela(highRNase)	PARIS	27180905
chr11:65444238-65444269	Exon	ENSG00000269821	KCNQ1OT1	ncRNA	chr11:2636306-2636360	Exon	human	Hela(highRNase)	PARIS	27180905
chr11:65440049-65440096	Exon	ENSG00000165102	HGSNAT	protein_coding	chr8:43199808-43199826	3UTR	human	Hela(highRNase)	PARIS	27180905
chr11:65439975-65440003	Exon	ENSG00000110801	PSMD9	protein_coding	chr12:121898661-121898696	CDS	human	Hela(highRNase)	PARIS	27180905
chr11:65439967-65440002	Exon	ENSG00000175482	POLD4	protein_coding	chr11:67352374-67352415	CDS	human	Hela(highRNase)	PARIS	27180905
chr11:65439719-65439746	Exon	ENSG00000189171	S100A13	protein_coding	chr1:153626680-153626711	CDS	human	Hela(highRNase)	PARIS	27180905
chr11:65425541-65425560	Exon	ENSG00000119523	ALG2	protein_coding	chr9:99218678-99218733	3UTR	human	Hela(highRNase)	PARIS	27180905
chr11:65425858-65425898	Exon	ENSG00000223705	NSUN5P1	pseudogene	chr7:75412913-75412949	Exon	human	Hela(highRNase)	PARIS	27180905
chr11:65425983-65426060	Exon	ENSG00000124164	VAPB	protein_coding	chr20:58445135-58445166	3UTR	human	Hela(highRNase)	PARIS	27180905
chr11:65426021-65426041	Exon	ENSG00000183943	PRKX	protein_coding	chrX:3606558-3606626	3UTR	human	Hela(highRNase)	PARIS	27180905
chr11:65426041-65426059	Exon	ENSG00000184154	LRTOMT	protein_coding	chr11:72109047-72109070	3UTR	human	Hela(highRNase)	PARIS	27180905
chr11:65426041-65426060	Exon	ENSG00000010818	HIVEP2	protein_coding	chr6:142760020-142760043	CDS	human	Hela(highRNase)	PARIS	27180905
chr11:65426050-65426068	Exon	ENSG00000148840	PPRC1	protein_coding	chr10:102141332-102141378	CDS	human	Hela(highRNase)	PARIS	27180905
chr11:65426144-65426166	Exon	ENSG00000198763	MT-ND2	protein_coding	chrM:4508-4541	CDS	human	Hela(highRNase)	PARIS	27180905
chr11:65426244-65426277	Exon	ENSG00000250426	FTLP10	pseudogene	chr4:68183089-68183129	Exon	human	Hela(highRNase)	PARIS	27180905
chr11:65425006-65425033	Exon	ENSG00000198886	MT-ND4	protein_coding	chrM:11284-11314	CDS	human	Hela(highRNase)	PARIS	27180905
chr11:65426342-65426385	Exon	ENSG00000025293	PHF20	protein_coding	chr20:35950361-35950381	3UTR	human	Hela(highRNase)	PARIS	27180905
chr11:65427056-65427130	Exon	ENSG00000196876	SCN8A	protein_coding	chr12:51807088-51807106	CDS	human	Hela(highRNase)	PARIS	27180905
chr11:65427148-65427189	Exon	ENSG00000143569	UBAP2L	protein_coding	chr1:154234678-154234700	CDS	human	Hela(highRNase)	PARIS	27180905
chr11:65427320-65427361	Exon	ENSG00000086570	FAT2	protein_coding	chr5:151521783-151521832	CDS	human	Hela(highRNase)	PARIS	27180905
chr11:65427345-65427417	Exon	ENSG00000196876	SCN8A	protein_coding	chr12:51807088-51807106	CDS	human	Hela(highRNase)	PARIS	27180905
chr11:65427613-65427647	Exon	ENSG00000218520	RP11-184C23	pseudogene	chr6:63229999-63230017	Exon	human	Hela(highRNase)	PARIS	27180905
chr11:65428361-65428406	Exon	ENSG00000139977	NAA30	protein_coding	chr14:57414715-57414733	3UTR	human	Hela(highRNase)	PARIS	27180905
chr11:65429385-65429411	Exon	ENSG00000185070	FLRT2	protein_coding	chr14:85627196-85627233	3UTR	human	Hela(highRNase)	PARIS	27180905
chr11:65429841-65429885	Exon	ENSG00000079308	TNS1	protein_coding	chr2:217802480-217802499	3UTR	human	Hela(highRNase)	PARIS	27180905
chr11:65429844-65429888	Exon	ENSG00000104979	C19orf53	protein_coding	chr19:13778230-13778248	3UTR	human	Hela(highRNase)	PARIS	27180905
chr11:65426710-65426751	Exon	ENSG00000151247	EIF4E	protein_coding	chr4:98880782-98880804	3UTR	human	Hela(highRNase)	PARIS	27180905
chr11:65424837-65424899	Exon	ENSG00000013588	GPRC5A	protein_coding	chr12:12913768-12913798	3UTR	human	Hela(highRNase)	PARIS	27180905
chr11:65424685-65424722	Exon	ENSG00000161057	PSMC2	protein_coding	chr7:103368308-103368336	3UTR	human	Hela(highRNase)	PARIS	27180905
chr11:65424644-65424663	Exon	ENSG00000107863	ARHGAP21	protein_coding	chr10:24607557-24607600	CDS	human	Hela(highRNase)	PARIS	27180905
chr11:65422876-65422901	Exon	ENSG00000108061	SHOC2	protein_coding	chr10:111012350-111012386	3UTR	human	Hela(highRNase)	PARIS	27180905
chr11:65423157-65423198	Exon	ENSG00000267520	RP11-373L24	ncRNA	chr2:60926447-60926505	Exon	human	Hela(highRNase)	PARIS	27180905
chr11:65423441-65423499	Exon	ENSG00000091542	ALKBH5	protein_coding	chr17:18209567-18209609	3UTR	human	Hela(highRNase)	PARIS	27180905
chr11:65423556-65423604	Exon	ENSG00000145113	MUC4	protein_coding	chr3:195784477-195784514	CDS	human	Hela(highRNase)	PARIS	27180905
chr11:65423626-65423665	Exon	ENSG00000129682	FGF13	protein_coding	chrX:138619389-138619447	3UTR	human	Hela(highRNase)	PARIS	27180905
chr11:65423854-65423911	Exon	ENSG00000210082	MT-RNR2	rRNA	chrM:2049-2070	Exon	human	Hela(highRNase)	PARIS	27180905
chr11:65424196-65424223	Exon	ENSG00000086062	B4GALT1	protein_coding	chr9:33110709-33110748	3UTR	human	Hela(highRNase)	PARIS	27180905
chr11:65424218-65424237	Exon	ENSG00000178965	ERICH3	protein_coding	chr1:74606663-74606681	CDS	human	Hela(highRNase)	PARIS	27180905
chr11:65424268-65424302	Exon	ENSG00000149313	AASDHPPT	protein_coding	chr11:106098336-106098369	CDS	human	Hela(highRNase)	PARIS	27180905
chr11:65424621-65424694	Exon	ENSG00000196876	SCN8A	protein_coding	chr12:51807088-51807106	CDS	human	Hela(highRNase)	PARIS	27180905
chr11:65424627-65424648	Exon	ENSG00000112130	RNF8	protein_coding	chr6:37391911-37391943	3UTR	human	Hela(highRNase)	PARIS	27180905
chr11:65424644-65424663	Exon	ENSG00000107863	ARHGAP21	protein_coding	chr10:24607564-24607600	CDS	human	Hela(highRNase)	PARIS	27180905
chr11:65429859-65429886	Exon	ENSG00000224074	LINC00691	lncRNA	chr3:24102974-24103022	Exon	human	Hela(highRNase)	PARIS	27180905
chr11:65429968-65430022	Exon	ENSG00000184277	TM2D3	protein_coding	chr15:101623480-101623501	CDS	human	Hela(highRNase)	PARIS	27180905
chr11:65430284-65430317	Exon	ENSG00000171044	XKR6	protein_coding	chr8:10924769-10924789	CDS	human	Hela(highRNase)	PARIS	27180905
chr11:65430287-65430327	Exon	ENSG00000171960	PPIH	protein_coding	chr1:42658466-42658490	CDS	human	Hela(highRNase)	PARIS	27180905
chr11:65435865-65435898	Exon	ENSG00000175322	ZNF519	protein_coding	chr18:14074845-14074883	CDS	human	Hela(highRNase)	PARIS	27180905
chr11:65436827-65436861	Exon	ENSG00000177733	HNRNPA0	protein_coding	chr5:137752077-137752103	3UTR	human	Hela(highRNase)	PARIS	27180905
chr11:65437369-65437396	Exon	ENSG00000198804	MT-CO1	protein_coding	chrM:7338-7371	CDS	human	Hela(highRNase)	PARIS	27180905
chr11:65437404-65437435	Exon	ENSG00000103005	USB1	protein_coding	chr16:58020951-58020981	CDS	human	Hela(highRNase)	PARIS	27180905
chr11:65437519-65437559	Exon	ENSG00000211459	MT-RNR1	rRNA	chrM:1525-1556	Exon	human	Hela(highRNase)	PARIS	27180905
chr11:65437529-65437558	Exon	ENSG00000104331	IMPAD1	protein_coding	chr8:56961223-56961255	3UTR	human	Hela(highRNase)	PARIS	27180905
chr11:65437558-65437584	Exon	ENSG00000078618	NRD1	protein_coding	chr1:51840346-51840389	CDS	human	Hela(highRNase)	PARIS	27180905
chr11:65437754-65437780	Exon	ENSG00000117036	ETV3	protein_coding	chr1:157124720-157124743	3UTR	human	Hela(highRNase)	PARIS	27180905
chr11:65437779-65437801	Exon	ENSG00000189334	S100A14	protein_coding	chr1:153615837-153615859	5UTR	human	Hela(highRNase)	PARIS	27180905
chr11:65437853-65437888	Exon	ENSG00000207340	RNVU1-1	snRNA	chr1:148362384-148362430	Exon	human	Hela(highRNase)	PARIS	27180905
chr11:65438079-65438128	Exon	ENSG00000154639	CXADR	protein_coding	chr21:17566325-17566364	3UTR	human	Hela(highRNase)	PARIS	27180905
chr11:65438392-65438467	Exon	ENSG00000196876	SCN8A	protein_coding	chr12:51807088-51807106	CDS	human	Hela(highRNase)	PARIS	27180905
chr11:65438555-65438574	Exon	ENSG00000218107	RP1-261G23	pseudogene	chr6:43706029-43706047	Exon	human	Hela(highRNase)	PARIS	27180905
chr11:65438608-65438636	Exon	ENSG00000237973	MTCO1P12	pseudogene	chr1:631906-631939	Exon	human	Hela(highRNase)	PARIS	27180905
chr11:65438610-65438628	Exon	ENSG00000154370	TRIM11	protein_coding	chr1:228394260-228394308	3UTR	human	Hela(highRNase)	PARIS	27180905
chr11:65438656-65438674	Exon	ENSG00000074219	TEAD2	protein_coding	chr19:49360396-49360418	5UTR	human	Hela(highRNase)	PARIS	27180905
chr11:65438656-65438674	Exon	ENSG00000074219	TEAD2	protein_coding	chr19:49360267-49360309	5UTR	human	Hela(highRNase)	PARIS	27180905
chr11:65438656-65438674	Exon	ENSG00000129437	KLK14	protein_coding	chr19:51077908-51077942	3UTR	human	Hela(highRNase)	PARIS	27180905
chr11:65439089-65439110	Exon	ENSG00000136888	ATP6V1G1	protein_coding	chr9:114598079-114598104	3UTR	human	Hela(highRNase)	PARIS	27180905
chr11:65439291-65439320	Exon	ENSG00000131475	VPS25	protein_coding	chr17:42779262-42779284	3UTR	human	Hela(highRNase)	PARIS	27180905
chr11:65439384-65439436	Exon	ENSG00000139832	RAB20	protein_coding	chr13:110523880-110523898	CDS	human	Hela(highRNase)	PARIS	27180905
chr11:65435716-65435788	Exon	ENSG00000196876	SCN8A	protein_coding	chr12:51807088-51807106	CDS	human	Hela(highRNase)	PARIS	27180905
chr11:65435031-65435061	Exon	ENSG00000198887	SMC5	protein_coding	chr9:70318804-70318856	CDS	human	Hela(highRNase)	PARIS	27180905
chr11:65434805-65434884	Exon	ENSG00000088543	C3orf18	protein_coding	chr3:50558479-50558499	3UTR	human	Hela(highRNase)	PARIS	27180905
chr11:65431048-65431072	Exon	ENSG00000260032	LINC00657	lncRNA	chr20:36049003-36049030	Exon	human	Hela(highRNase)	PARIS	27180905
chr11:65431048-65431073	Exon	ENSG00000276216	CH17-373J23	lncRNA	chr1:145281186-145281219	Exon	human	Hela(highRNase)	PARIS	27180905
chr11:65431197-65431225	Exon	ENSG00000236532	AL035610	lncRNA	chr21:28117345-28117368	Exon	human	Hela(highRNase)	PARIS	27180905
chr11:65431492-65431512	Exon	ENSG00000151012	SLC7A11	protein_coding	chr4:138171075-138171097	3UTR	human	Hela(highRNase)	PARIS	27180905
chr11:65431494-65431571	Exon	ENSG00000140396	NCOA2	protein_coding	chr8:70109993-70110022	3UTR	human	Hela(highRNase)	PARIS	27180905
chr11:65431613-65431651	Exon	ENSG00000128165	ADM2	protein_coding	chr22:50483186-50483208	3UTR	human	Hela(highRNase)	PARIS	27180905
chr11:65431950-65431981	Exon	ENSG00000134308	YWHAQ	protein_coding	chr2:9591455-9591494	CDS	human	Hela(highRNase)	PARIS	27180905
chr11:65431987-65432027	Exon	ENSG00000101935	AMMECR1	protein_coding	chrX:110197631-110197662	3UTR	human	Hela(highRNase)	PARIS	27180905
chr11:65431987-65432027	Exon	ENSG00000101935	AMMECR1	protein_coding	chrX:110197609-110197662	3UTR	human	Hela(highRNase)	PARIS	27180905
chr11:65432715-65432762	Exon	ENSG00000111602	TIMELESS	protein_coding	chr12:56423796-56423822	CDS	human	Hela(highRNase)	PARIS	27180905
chr11:65432836-65432859	Exon	ENSG00000068366	ACSL4	protein_coding	chrX:109642780-109642816	3UTR	human	Hela(highRNase)	PARIS	27180905
chr11:65433094-65433118	Exon	ENSG00000115239	ASB3	protein_coding	chr2:53533470-53533503	3UTR	human	Hela(highRNase)	PARIS	27180905
chr11:65433122-65433171	Exon	ENSG00000170500	LONRF2	protein_coding	chr2:100279654-100279680	3UTR	human	Hela(highRNase)	PARIS	27180905
chr11:65433199-65433223	Exon	ENSG00000210082	MT-RNR2	rRNA	chrM:1741-1772	Exon	human	Hela(highRNase)	PARIS	27180905
chr11:65433438-65433473	Exon	ENSG00000188056	TREML4	protein_coding	chr6:41232483-41232503	3UTR	human	Hela(highRNase)	PARIS	27180905
chr11:65433496-65433530	Exon	ENSG00000008988	RPS20	protein_coding	chr8:56073696-56073742	CDS	human	Hela(highRNase)	PARIS	27180905
chr11:65433608-65433633	Exon	ENSG00000210082	MT-RNR2	rRNA	chrM:2423-2458	Exon	human	Hela(highRNase)	PARIS	27180905
chr11:65434080-65434106	Exon	ENSG00000234773	CTD-2666L21	lncRNA	chr19:12237682-12237705	Exon	human	Hela(highRNase)	PARIS	27180905
chr11:65434082-65434102	Exon	ENSG00000266821	RP11-6N17	lncRNA	chr17:47880573-47880597	Exon	human	Hela(highRNase)	PARIS	27180905
chr11:65434728-65434749	Exon	ENSG00000113734	BNIP1	protein_coding	chr5:173164095-173164115	3UTR	human	Hela(highRNase)	PARIS	27180905
chr11:65434749-65434793	Exon	ENSG00000137868	STRA6	protein_coding	chr15:74182171-74182190	CDS	human	Hela(highRNase)	PARIS	27180905
chr11:65435019-65435040	Exon	ENSG00000180113	TDRD6	protein_coding	chr6:46702229-46702258	3UTR	human	Hela(highRNase)	PARIS	27180905
chr11:65423255-65423275	Exon	ENSG00000010244	ZNF207	protein_coding	chr17:32365411-32365437	CDS	human	HEK293T	PARIS	27180905
chr11:65423847-65423879	Exon	ENSG00000273062	RP11-428K3	ncRNA	chr1:178724888-178724919	Exon	human	HEK293T	PARIS	27180905
chr11:65445426-65445451	Exon	ENSG00000121104	FAM117A	protein_coding	chr17:49710359-49710381	3UTR	human	HEK293T	PARIS	27180905
chr11:65445430-65445451	Exon	ENSG00000121104	FAM117A	protein_coding	chr17:49710359-49710381	3UTR	human	HEK293T	PARIS	27180905
chr11:65445431-65445454	Exon	ENSG00000115008	IL1A	protein_coding	chr2:112781694-112781717	CDS	human	HEK293T	PARIS	27180905
chr11:65445436-65445454	Exon	ENSG00000115008	IL1A	protein_coding	chr2:112781693-112781717	CDS	human	HEK293T	PARIS	27180905
chr11:65442298-65442318	Exon	ENSG00000189114	BLOC1S3	protein_coding	chr19:45180533-45180556	3UTR	human	HEK293T	PARIS	27180905
chr11:65442247-65442274	Exon	ENSG00000201428	RN7SKP71	ncRNA	chr12:112267194-112267231	Exon	human	HEK293T	PARIS	27180905
chr11:65441979-65442000	Exon	ENSG00000063244	U2AF2	protein_coding	chr19:55659212-55659255	CDS	human	HEK293T	PARIS	27180905
chr11:65424266-65424287	Exon	ENSG00000226455	RP3-512E2	ncRNA	chr6:89953075-89953096	Exon	human	HEK293T	PARIS	27180905
chr11:65424640-65424666	Exon	ENSG00000006377	DLX6	protein_coding	chr7:97005706-97005724	5UTR	human	HEK293T	PARIS	27180905
chr11:65424641-65424659	Exon	ENSG00000183307	CECR6	protein_coding	chr22:17119655-17119674	CDS	human	HEK293T	PARIS	27180905
chr11:65424931-65424960	Exon	ENSG00000112096	SOD2	protein_coding	chr6:159678736-159678766	3UTR	human	HEK293T	PARIS	27180905
chr11:65427242-65427274	Exon	ENSG00000116752	BCAS2	protein_coding	chr1:114567609-114567635	3UTR	human	HEK293T	PARIS	27180905
chr11:65427849-65427880	Exon	ENSG00000090470	PDCD7	protein_coding	chr15:65118171-65118189	3UTR	human	HEK293T	PARIS	27180905
chr11:65427912-65427938	Exon	ENSG00000212907	MT-ND4L	protein_coding	chrM:10677-10716	CDS	human	HEK293T	PARIS	27180905
chr11:65428367-65428390	Exon	ENSG00000186377	CYP4X1	protein_coding	chr1:47039393-47039435	CDS	human	HEK293T	PARIS	27180905
chr11:65428378-65428409	Exon	ENSG00000100462	PRMT5	protein_coding	chr14:22926743-22926762	CDS	human	HEK293T	PARIS	27180905
chr11:65429367-65429387	Exon	ENSG00000131504	DIAPH1	protein_coding	chr5:141516872-141516912	CDS	human	HEK293T	PARIS	27180905
chr11:65429829-65429853	Exon	ENSG00000275877	5_8S_rRNA	rRNA	chr20:30484978-30485000	Exon	human	HEK293T	PARIS	27180905
chr11:65429870-65429903	Exon	ENSG00000165914	TTC7B	protein_coding	chr14:90536167-90536198	3UTR	human	HEK293T	PARIS	27180905
chr11:65430217-65430251	Exon	ENSG00000226954	RP5-983L19	lncRNA	chr22:49719559-49719577	Exon	human	HEK293T	PARIS	27180905
chr11:65434215-65434233	Exon	ENSG00000143093	STRIP1	protein_coding	chr1:110053927-110053958	CDS	human	HEK293T	PARIS	27180905
chr11:65435019-65435040	Exon	ENSG00000141934	PLPP2	protein_coding	chr19:288055-288077	CDS	human	HEK293T	PARIS	27180905
chr11:65435716-65435742	Exon	ENSG00000154265	ABCA5	protein_coding	chr17:69255558-69255576	CDS	human	HEK293T	PARIS	27180905
chr11:65436131-65436166	Exon	ENSG00000231389	HLA-DPA1	protein_coding	chr6:33066291-33066309	CDS	human	HEK293T	PARIS	27180905
chr11:65436825-65436848	Exon	ENSG00000207175	RNU1-67P	snRNA	chrX:119423812-119423845	Exon	human	HEK293T	PARIS	27180905
chr11:65436938-65436971	Exon	ENSG00000228597	MTND4P1	pseudogene	chr13:84520166-84520184	Exon	human	HEK293T	PARIS	27180905
chr11:65438077-65438118	Exon	ENSG00000131748	STARD3	protein_coding	chr17:39658537-39658557	CDS	human	HEK293T	PARIS	27180905
chr11:65441295-65441318	Exon	ENSG00000184009	ACTG1	protein_coding	chr17:81512056-81512087	CDS	human	HEK293T	PARIS	27180905
chr11:65442076-65442105	Exon	ENSG00000211459	MT-RNR1	rRNA	chrM:694-720	Exon	human	HEK293T	PARIS	27180905
chr11:65422853-65422884	Exon	ENSG00000147649	MTDH	protein_coding	chr8:97727617-97727668	3UTR	human	Hela(lowRNase)	PARIS	27180905
chr11:65422937-65422992	Exon	ENSG00000102226	USP11	protein_coding	chrX:47248117-47248168	3UTR	human	Hela(lowRNase)	PARIS	27180905
chr11:65423000-65423022	Exon	ENSG00000177679	SRRM3	protein_coding	chr7:76286558-76286580	3UTR	human	Hela(lowRNase)	PARIS	27180905
chr11:65423157-65423198	Exon	ENSG00000267520	RP11-373L24	ncRNA	chr2:60926447-60926497	Exon	human	Hela(lowRNase)	PARIS	27180905
chr11:65423157-65423198	Exon	ENSG00000267520	RP11-373L24	ncRNA	chr2:60926447-60926505	Exon	human	Hela(lowRNase)	PARIS	27180905
chr11:65427075-65427143	Exon	ENSG00000149187	CELF1	protein_coding	chr11:47472310-47472348	CDS	human	Hela(lowRNase)	PARIS	27180905
chr11:65427345-65427417	Exon	ENSG00000196876	SCN8A	protein_coding	chr12:51807088-51807106	CDS	human	Hela(lowRNase)	PARIS	27180905
chr11:65427413-65427431	Exon	ENSG00000198763	MT-ND2	protein_coding	chrM:5285-5312	CDS	human	Hela(lowRNase)	PARIS	27180905
chr11:65427783-65427840	Exon	ENSG00000100207	TCF20	protein_coding	chr22:42160098-42160139	3UTR	human	Hela(lowRNase)	PARIS	27180905
chr11:65429739-65429761	Exon	ENSG00000198786	MT-ND5	protein_coding	chrM:13344-13386	CDS	human	Hela(lowRNase)	PARIS	27180905
chr11:65429841-65429885	Exon	ENSG00000079308	TNS1	protein_coding	chr2:217802480-217802499	3UTR	human	Hela(lowRNase)	PARIS	27180905
chr11:65430326-65430363	Exon	ENSG00000203993	ARRDC1-AS1	ncRNA	chr9:137618443-137618465	Exon	human	Hela(lowRNase)	PARIS	27180905
chr11:65431046-65431070	Exon	ENSG00000261669	CTD-2515A14	ncRNA	chr16:24803638-24803692	Exon	human	Hela(lowRNase)	PARIS	27180905
chr11:65431046-65431076	Exon	ENSG00000168036	CTNNB1	protein_coding	chr3:41233579-41233609	CDS	human	Hela(lowRNase)	PARIS	27180905
chr11:65427075-65427143	Exon	ENSG00000149187	CELF1	protein_coding	chr11:47472326-47472348	CDS	human	Hela(lowRNase)	PARIS	27180905
chr11:65431048-65431072	Exon	ENSG00000260032	LINC00657	lncRNA	chr20:36049003-36049030	Exon	human	Hela(lowRNase)	PARIS	27180905
chr11:65431283-65431304	Exon	ENSG00000131844	MCCC2	protein_coding	chr5:71657298-71657339	3UTR	human	Hela(lowRNase)	PARIS	27180905
chr11:65431613-65431651	Exon	ENSG00000128165	ADM2	protein_coding	chr22:50483186-50483208	3UTR	human	Hela(lowRNase)	PARIS	27180905
chr11:65431655-65431678	Exon	ENSG00000206573	THUMPD3-AS1	ncRNA	chr3:9395070-9395096	Exon	human	Hela(lowRNase)	PARIS	27180905
chr11:65432260-65432293	Exon	ENSG00000196591	HDAC2	protein_coding	chr6:113959965-113959992	CDS	human	Hela(lowRNase)	PARIS	27180905
chr11:65432295-65432320	Exon	ENSG00000148773	MKI67	protein_coding	chr10:128109168-128109217	CDS	human	Hela(lowRNase)	PARIS	27180905
chr11:65432358-65432389	Exon	ENSG00000198763	MT-ND2	protein_coding	chrM:4999-5056	CDS	human	Hela(lowRNase)	PARIS	27180905
chr11:65432698-65432724	Exon	ENSG00000066427	ATXN3	protein_coding	chr14:92040417-92040439	3UTR	human	Hela(lowRNase)	PARIS	27180905
chr11:65433049-65433080	Exon	ENSG00000067167	TRAM1	protein_coding	chr8:70574620-70574652	3UTR	human	Hela(lowRNase)	PARIS	27180905
chr11:65433438-65433473	Exon	ENSG00000188056	TREML4	protein_coding	chr6:41232483-41232503	3UTR	human	Hela(lowRNase)	PARIS	27180905
chr11:65431048-65431073	Exon	ENSG00000276216	CH17-373J23	lncRNA	chr1:145281186-145281221	Exon	human	Hela(lowRNase)	PARIS	27180905
chr11:65427025-65427067	Exon	ENSG00000070756	PABPC1	protein_coding	chr8:100703315-100703334	3UTR	human	Hela(lowRNase)	PARIS	27180905
chr11:65426496-65426522	Exon	ENSG00000257122	RRN3P3	pseudogene	chr16:22419516-22419548	Exon	human	Hela(lowRNase)	PARIS	27180905
chr11:65426480-65426501	Exon	ENSG00000198804	MT-CO1	protein_coding	chrM:6484-6524	CDS	human	Hela(lowRNase)	PARIS	27180905
chr11:65423179-65423201	Exon	ENSG00000237973	MTCO1P12	pseudogene	chr1:631583-631617	Exon	human	Hela(lowRNase)	PARIS	27180905
chr11:65423556-65423604	Exon	ENSG00000145113	MUC4	protein_coding	chr3:195784477-195784514	CDS	human	Hela(lowRNase)	PARIS	27180905
chr11:65423854-65423911	Exon	ENSG00000210082	MT-RNR2	rRNA	chrM:2049-2070	Exon	human	Hela(lowRNase)	PARIS	27180905
chr11:65424196-65424223	Exon	ENSG00000086062	B4GALT1	protein_coding	chr9:33110708-33110748	3UTR	human	Hela(lowRNase)	PARIS	27180905
chr11:65424270-65424322	Exon	ENSG00000089053	ANAPC5	protein_coding	chr12:121328103-121328128	CDS	human	Hela(lowRNase)	PARIS	27180905
chr11:65424461-65424507	Exon	ENSG00000169495	HTRA4	protein_coding	chr8:38974583-38974603	CDS	human	Hela(lowRNase)	PARIS	27180905
chr11:65424672-65424709	Exon	ENSG00000163673	DCLK3	protein_coding	chr3:36738910-36738931	5UTR	human	Hela(lowRNase)	PARIS	27180905
chr11:65424805-65424838	Exon	ENSG00000187079	TEAD1	protein_coding	chr11:12942836-12942865	3UTR	human	Hela(lowRNase)	PARIS	27180905
chr11:65424951-65424978	Exon	ENSG00000088832	FKBP1A	protein_coding	chr20:1369990-1370027	3UTR	human	Hela(lowRNase)	PARIS	27180905
chr11:65425025-65425056	Exon	ENSG00000181458	TMEM45A	protein_coding	chr3:100573595-100573664	CDS	human	Hela(lowRNase)	PARIS	27180905
chr11:65425227-65425246	Exon	ENSG00000222438	RNU6-1077P	snRNA	chr12:130869765-130869796	Exon	human	Hela(lowRNase)	PARIS	27180905
chr11:65425307-65425348	Exon	ENSG00000210082	MT-RNR2	rRNA	chrM:3189-3219	Exon	human	Hela(lowRNase)	PARIS	27180905
chr11:65425405-65425431	Exon	ENSG00000281039	RP4-777O23	protein_coding	chr7:30497136-30497167	CDS	human	Hela(lowRNase)	PARIS	27180905
chr11:65425541-65425560	Exon	ENSG00000119523	ALG2	protein_coding	chr9:99218678-99218733	3UTR	human	Hela(lowRNase)	PARIS	27180905
chr11:65425726-65425755	Exon	ENSG00000122565	CBX3	protein_coding	chr7:26212943-26212966	3UTR	human	Hela(lowRNase)	PARIS	27180905
chr11:65425967-65425994	Exon	ENSG00000153201	RANBP2	protein_coding	chr2:108763650-108763721	CDS	human	Hela(lowRNase)	PARIS	27180905
chr11:65426021-65426041	Exon	ENSG00000183943	PRKX	protein_coding	chrX:3606558-3606626	3UTR	human	Hela(lowRNase)	PARIS	27180905
chr11:65426050-65426068	Exon	ENSG00000148840	PPRC1	protein_coding	chr10:102141332-102141378	CDS	human	Hela(lowRNase)	PARIS	27180905
chr11:65426144-65426166	Exon	ENSG00000198763	MT-ND2	protein_coding	chrM:4508-4541	CDS	human	Hela(lowRNase)	PARIS	27180905
chr11:65426229-65426254	Exon	ENSG00000206341	HLA-H	pseudogene	chr6:29889339-29889384	Exon	human	Hela(lowRNase)	PARIS	27180905
chr11:65426353-65426372	Exon	ENSG00000077232	DNAJC10	protein_coding	chr2:182780437-182780474	3UTR	human	Hela(lowRNase)	PARIS	27180905
chr11:65433496-65433530	Exon	ENSG00000008988	RPS20	protein_coding	chr8:56073696-56073744	CDS	human	Hela(lowRNase)	PARIS	27180905
chr11:65433602-65433620	Exon	ENSG00000211459	MT-RNR1	rRNA	chrM:1219-1257	Exon	human	Hela(lowRNase)	PARIS	27180905
chr11:65434218-65434253	Exon	ENSG00000198886	MT-ND4	protein_coding	chrM:11155-11182	CDS	human	Hela(lowRNase)	PARIS	27180905
chr11:65434242-65434261	Exon	ENSG00000114346	ECT2	protein_coding	chr3:172754550-172754582	CDS	human	Hela(lowRNase)	PARIS	27180905
chr11:65442292-65442321	Exon	ENSG00000163884	KLF15	protein_coding	chr3:126343151-126343180	3UTR	human	Hela(lowRNase)	PARIS	27180905
chr11:65442296-65442321	Exon	ENSG00000163884	KLF15	protein_coding	chr3:126343151-126343180	3UTR	human	Hela(lowRNase)	PARIS	27180905
chr11:65442300-65442321	Exon	ENSG00000163884	KLF15	protein_coding	chr3:126343151-126343179	3UTR	human	Hela(lowRNase)	PARIS	27180905
chr11:65442545-65442567	Exon	ENSG00000186432	KPNA4	protein_coding	chr3:160496016-160496053	3UTR	human	Hela(lowRNase)	PARIS	27180905
chr11:65442598-65442620	Exon	ENSG00000100461	RBM23	protein_coding	chr14:22894764-22894811	3UTR	human	Hela(lowRNase)	PARIS	27180905
chr11:65444238-65444269	Exon	ENSG00000269821	KCNQ1OT1	ncRNA	chr11:2636306-2636360	Exon	human	Hela(lowRNase)	PARIS	27180905
chr11:65444980-65445000	Exon	ENSG00000198763	MT-ND2	protein_coding	chrM:4949-4973	CDS	human	Hela(lowRNase)	PARIS	27180905
chr11:65445138-65445156	Exon	ENSG00000158467	AHCYL2	protein_coding	chr7:129427714-129427733	3UTR	human	Hela(lowRNase)	PARIS	27180905
chr11:65442279-65442321	Exon	ENSG00000163884	KLF15	protein_coding	chr3:126343151-126343180	3UTR	human	Hela(lowRNase)	PARIS	27180905
chr11:65441176-65441201	Exon	ENSG00000210082	MT-RNR2	rRNA	chrM:2997-3026	Exon	human	Hela(lowRNase)	PARIS	27180905
chr11:65440587-65440605	Exon	ENSG00000226017	PRICKLE2-AS3	ncRNA	chr3:64200852-64200877	Exon	human	Hela(lowRNase)	PARIS	27180905
chr11:65434857-65434884	Exon	ENSG00000247627	MTND4P12	pseudogene	chr5:134927155-134927190	Exon	human	Hela(lowRNase)	PARIS	27180905
chr11:65435143-65435161	Exon	ENSG00000206585	RNVU1-7	snRNA	chr1:148038813-148038844	Exon	human	Hela(lowRNase)	PARIS	27180905
chr11:65435143-65435161	Exon	ENSG00000207201	RNU1-148P	snRNA	chr8:24077067-24077087	Exon	human	Hela(lowRNase)	PARIS	27180905
chr11:65435175-65435209	Exon	ENSG00000211459	MT-RNR1	rRNA	chrM:1076-1102	Exon	human	Hela(lowRNase)	PARIS	27180905
chr11:65435183-65435211	Exon	ENSG00000198786	MT-ND5	protein_coding	chrM:13744-13776	CDS	human	Hela(lowRNase)	PARIS	27180905
chr11:65435331-65435383	Exon	ENSG00000179477	ALOX12B	protein_coding	chr17:8073256-8073274	CDS	human	Hela(lowRNase)	PARIS	27180905
chr11:65435716-65435788	Exon	ENSG00000196876	SCN8A	protein_coding	chr12:51807088-51807106	CDS	human	Hela(lowRNase)	PARIS	27180905
chr11:65436180-65436201	Exon	ENSG00000138161	CUZD1	protein_coding	chr10:122836854-122836889	CDS	human	Hela(lowRNase)	PARIS	27180905
chr11:65436272-65436298	Exon	ENSG00000183117	CSMD1	protein_coding	chr8:2949334-2949355	CDS	human	Hela(lowRNase)	PARIS	27180905
chr11:65436908-65436934	Exon	ENSG00000213064	SFT2D2	protein_coding	chr1:168252651-168252704	3UTR	human	Hela(lowRNase)	PARIS	27180905
chr11:65436915-65436934	Exon	ENSG00000165511	C10orf25	ncRNA	chr10:44997784-44997802	Exon	human	Hela(lowRNase)	PARIS	27180905
chr11:65436968-65437000	Exon	ENSG00000237171	GS1-466O4	pseudogene	chrX:26224148-26224172	Exon	human	Hela(lowRNase)	PARIS	27180905
chr11:65437369-65437396	Exon	ENSG00000198804	MT-CO1	protein_coding	chrM:7338-7371	CDS	human	Hela(lowRNase)	PARIS	27180905
chr11:65438525-65438547	Exon	ENSG00000272398	CD24	protein_coding	chr6:106970598-106970649	3UTR	human	Hela(lowRNase)	PARIS	27180905
chr11:65438607-65438648	Exon	ENSG00000188167	TMPPE	protein_coding	chr3:33091768-33091831	3UTR	human	Hela(lowRNase)	PARIS	27180905
chr11:65438610-65438628	Exon	ENSG00000154370	TRIM11	protein_coding	chr1:228394260-228394308	3UTR	human	Hela(lowRNase)	PARIS	27180905
chr11:65438898-65438940	Exon	ENSG00000249096	RP11-290F5	lncRNA	chr4:184368685-184368709	Exon	human	Hela(lowRNase)	PARIS	27180905
chr11:65439399-65439417	Exon	ENSG00000075413	MARK3	protein_coding	chr14:103491432-103491490	CDS	human	Hela(lowRNase)	PARIS	27180905
chr11:65439483-65439504	Exon	ENSG00000210082	MT-RNR2	rRNA	chrM:2321-2351	Exon	human	Hela(lowRNase)	PARIS	27180905
chr11:65439895-65439926	Exon	ENSG00000213463	SYNJ2BP	protein_coding	chr14:70371628-70371677	3UTR	human	Hela(lowRNase)	PARIS	27180905
chr11:65440361-65440387	Exon	ENSG00000115112	TFCP2L1	protein_coding	chr2:121220310-121220330	3UTR	human	Hela(lowRNase)	PARIS	27180905
chr11:65440750-65440789	Exon	ENSG00000130741	EIF2S3	protein_coding	chrX:24077122-24077166	3UTR	human	Hela(lowRNase)	PARIS	27180905
chr11:65423776-65423817	Exon	.	18S_RRNA	rRNA	.	.	human	Hela	SPLASH	27184079
chr11:65424776-65424817	Exon	.	28S_RRNA	rRNA	.	.	human	Hela	SPLASH	27184079
chr11:65422876-65422917	Exon	.	28S_RRNA	rRNA	.	.	human	Hela	SPLASH	27184079
chr11:65422776-65422817	Exon	.	28S_RRNA	rRNA	.	.	human	Hela	SPLASH	27184079
chr11:65424876-65424917	Exon	.	18S_RRNA	rRNA	.	.	human	Hela	SPLASH	27184079
chr11:65423476-65423517	Exon	.	18S_RRNA	rRNA	.	.	human	Hela	SPLASH	27184079
chr11:65422876-65422917	Exon	.	18S_RRNA	rRNA	.	.	human	Hela	SPLASH	27184079
chr11:65425976-65426017	Exon	.	28S_RRNA	rRNA	.	.	human	Hela	SPLASH	27184079
chr11:65423776-65423817	Exon	.	28S_RRNA	rRNA	.	.	human	Hela	SPLASH	27184079
.	.	.	HY3_SCRNA	lncRNA	.	.	human	HEK293T	LIGRseq	27184080
.	.	ENSG00000168298	HIST1H1E	lncRNA	.	.	human	HEK293T	LIGRseq	27184080
.	.	ENSG00000207935	MIR204	miRNA	.	.	human	.	RAINv1.0	28077569
.	.	ENSG00000248008	NRAV	ncRNA	.	.	human	.	RAINv1.0	28077569
.	.	ENSG00000228630	HOTAIR	ncRNA	.	.	human	.	RAINv1.0	28077569
.	.	ENSG00000215386	MIR99AHG	lncRNA	.	.	human	.	RAINv1.0	28077569
.	.	ENSG00000230223	ATXN8OS	ncRNA	.	.	human	.	RAINv1.0	28077569
.	.	ENSG00000236824	BCYRN1	lncRNA	.	.	human	.	RAINv1.0	28077569
.	.	ENSG00000226950	DANCR	ncRNA	.	.	human	.	RAINv1.0	28077569
.	.	ENSG00000237517	DGCR5	ncRNA	.	.	human	.	RAINv1.0	28077569
.	.	ENSG00000198983	MIR449A	miRNA	.	.	human	.	RAINv1.0	28077569
.	.	ENSG00000281560	LSINCT5	lncRNA	.	.	human	.	RAINv1.0	28077569
.	.	ENSG00000259758	CASC7	others	.	.	human	.	RAINv1.0	28077569
.	.	ENSG00000283293	RN7SK	snRNA	.	.	human	.	RAINv1.0	28077569
.	.	ENSG00000199015	MIR377	miRNA	.	.	human	.	RAINv1.0	28077569
.	.	ENSG00000277653	CDKN2B-AS	ncRNA	.	.	human	.	RAINv1.0	28077569
.	.	ENSG00000207731	MIR506	miRNA	.	.	human	.	RAINv1.0	28077569
.	.	ENSG00000199043	MIR335	miRNA	.	.	human	.	RAINv1.0	28077569
.	.	ENSG00000225783	MIAT	lncRNA	.	.	human	.	RAINv1.0	28077569
.	.	ENSG00000207585	MIR181D	miRNA	.	.	human	.	RAINv1.0	28077569
.	.	ENSG00000279576	AP000769	protein_coding	.	.	human	.	RAINv1.0	28077569
.	.	ENSG00000171889	MIR31HG	lncRNA	.	.	human	.	RAINv1.0	28077569
.	.	ENSG00000278768	BACE1-AS	ncRNA	.	.	human	.	RAINv1.0	28077569
.	.	ENSG00000198997	MIR107	miRNA	.	.	human	.	RAINv1.0	28077569
.	.	ENSG00000234883	MIR155HG	lncRNA	.	.	human	.	RAINv1.0	28077569
.	.	.	hsa-mir-129-5p	miRNA	.	.	human	.	RAINv1.0	28077569
.	.	ENSG00000271886	MIR98	miRNA	.	.	human	.	RAINv1.0	28077569
.	.	ENSG00000198972	MIRLET7E	miRNA	.	.	human	.	RAINv1.0	28077569
.	.	ENSG00000278778	HTT-AS1_1	ncRNA	.	.	human	.	RAINv1.0	28077569
.	.	ENSG00000213468	FIRRE	lncRNA	.	.	human	.	RAINv1.0	28077569
.	.	ENSG00000264539	MIR548AR	miRNA	.	.	human	.	RAINv1.0	28077569
.	.	ENSG00000225613	LINCMD1	lncRNA	.	.	human	.	RAINv1.0	28077569
.	.	ENSG00000245573	BDNF-AS	ncRNA	.	.	human	.	RAINv1.0	28077569
.	.	ENSG00000212051	MIR320C2	miRNA	.	.	human	.	RAINv1.0	28077569
.	.	ENSG00000240405	LINC01212	lncRNA	.	.	human	.	RAINv1.0	28077569
.	.	ENSG00000207728	MIR449B	miRNA	.	.	human	.	RAINv1.0	28077569
.	.	.	hsa-mir-7-5p	miRNA	.	.	human	.	RAINv1.0	28077569
.	.	ENSG00000234741	GAS5	ncRNA	.	.	human	.	RAINv1.0	28077569
.	.	ENSG00000274086	FMR1-AS1_2	ncRNA	.	.	human	.	RAINv1.0	28077569
.	.	ENSG00000281560	LSINCT5	lncRNA	.	.	human	.	RAIDv2.0	21532345
.	.	ENSG00000207728	MIR449B	miRNA	.	.	human	.	RAIDv2.0	26242266
.	.	ENSG00000228549	RP11-108M9	lncRNA	.	.	human	.	NPInterv3.0	23846593
.	.	ENSG00000186594	MIR22HG	lncRNA	.	.	human	.	NPInterv3.0	23846593
.	.	.	RP4-550H1.6	others	.	.	human	.	NPInterv3.0	23846593
.	.	ENSG00000278140	U6	snRNA	.	.	human	HEK293T	LIGRseq	27184080
.	.	ENSG00000280620	SCAANT1	ncRNA	.	.	human	.	RAINv1.0	28077569
.	.	ENSG00000277209	RPPH1	ncRNA	.	.	human	.	RAINv1.0	28077569
.	.	ENSG00000251173	UCHL1-AS1	ncRNA	.	.	human	.	RAINv1.0	28077569
.	.	.	TP53COR1	others	.	.	human	.	RAINv1.0	28077569
.	.	ENSG00000229807	XIST	lncRNA	.	.	human	.	RAINv1.0	28077569
.	.	ENSG00000247556	OIP5-AS1	ncRNA	.	.	human	.	RAINv1.0	28077569
.	.	ENSG00000255717	SNHG1	ncRNA	.	.	human	.	RAINv1.0	28077569
.	.	ENSG00000279192	PWAR5	protein_coding	.	.	human	.	RAINv1.0	28077569
.	.	ENSG00000227199	ST7-AS1	ncRNA	.	.	human	.	RAINv1.0	28077569
.	.	ENSG00000253352	TUG1	ncRNA	.	.	human	.	RAINv1.0	28077569
.	.	ENSG00000225964	NRIR	ncRNA	.	.	human	.	RAINv1.0	28077569
.	.	ENSG00000281881	SPRY4-IT1	lncRNA	.	.	human	.	RAINv1.0	28077569
.	.	ENSG00000253079	NRON	ncRNA	.	.	human	.	RAINv1.0	28077569
.	.	ENSG00000105221	AKT2	protein_coding	.	.	human	.	RAIDv2.0	24704424, 23478189
.	.	ENSG00000141510	TP53	protein_coding	.	.	human	.	RAIDv2.0	20417621
.	.	ENSG00000283638	AC002407.3	miRNA	.	.	human	.	NPInterv3.0	25531890
